# Supplementary material
Source: PubMed Central journal article supplement (PMC2651298)
Supplement: 0810318105_0810318105SI.pdf [file 0810318105_0810318105SI.pdf]

# Supporting Information

Hanson *et al.* 10.1073/pnas.0810318105

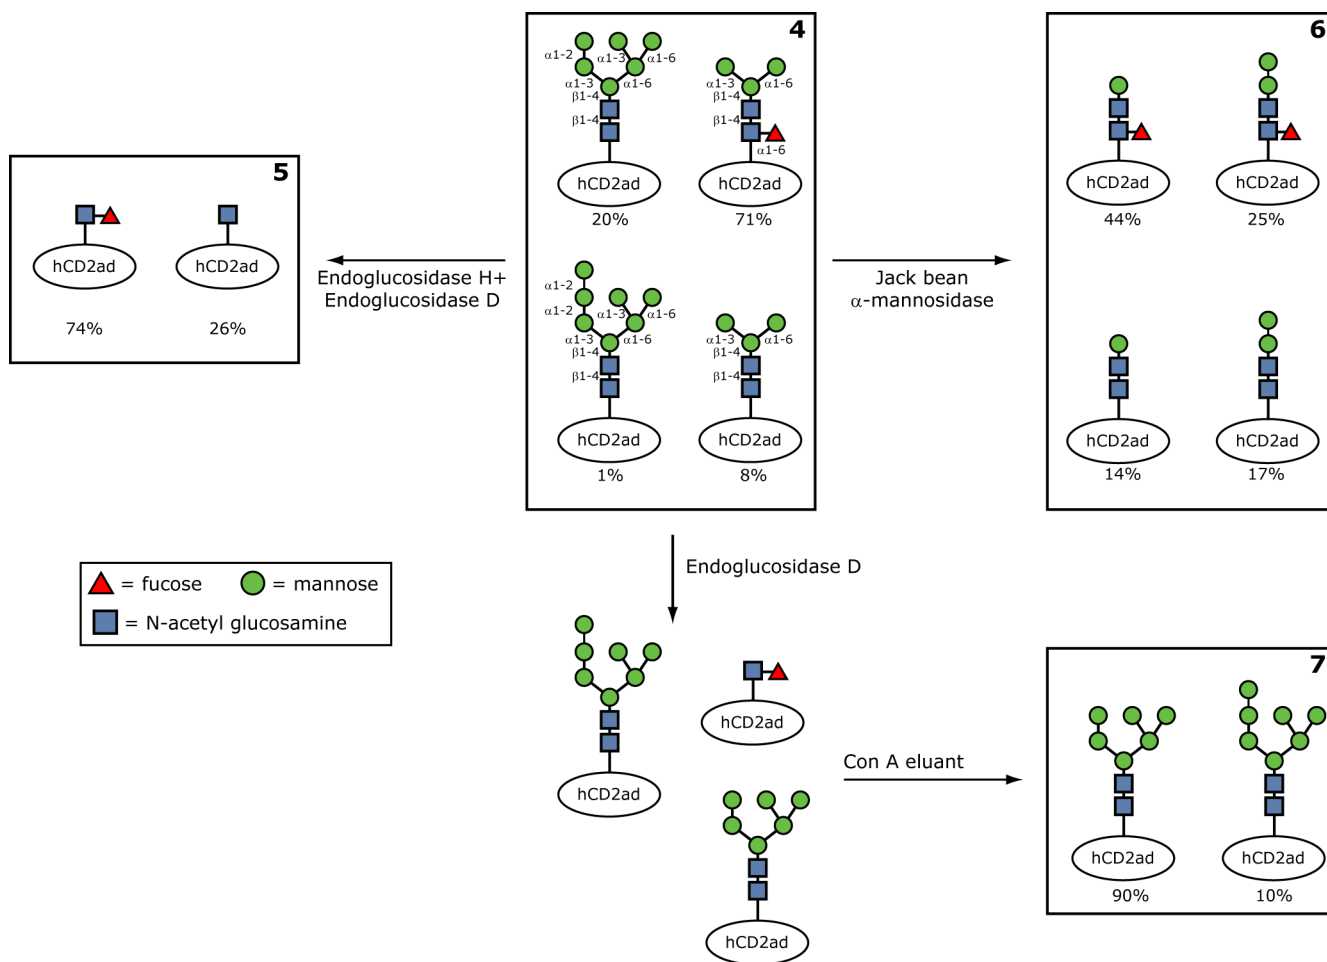

Fig. S1. Enzymatic remodeling of hCD2ad. Numbers under glycoforms indicate the percent of each glycoform in the mixture.

**A. Individual digest (14h)**

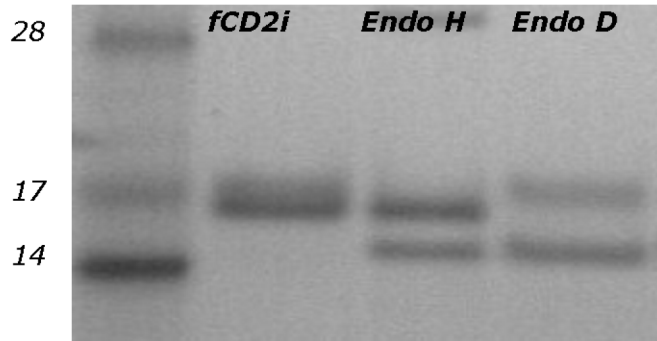

**\*\*Coomassie Blue Stain**

**B. Double digest, Endo H & D, time course:**

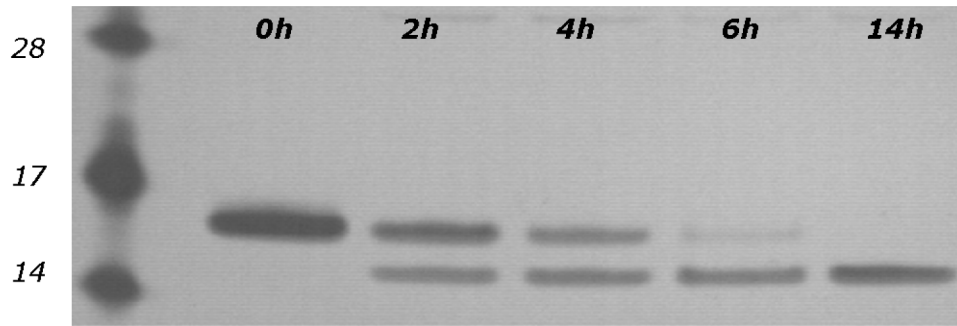

**\*\*SilverSnap Stain**

**C. ConA purification of Endo digested fCD2i**

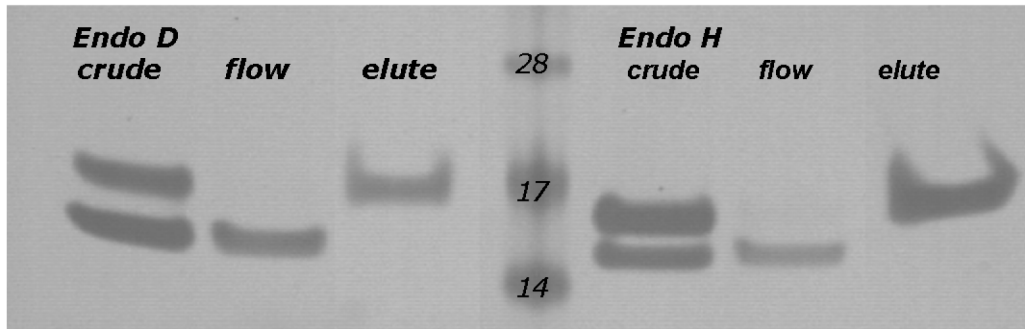

**\*\*SilverSnap Stain**

Fig. S2. Analysis of enzymatic remodeling of hCD2ad variant 4 (labeled as fCD2i in the figure) with endoglycosidases by SDS/PAGE.

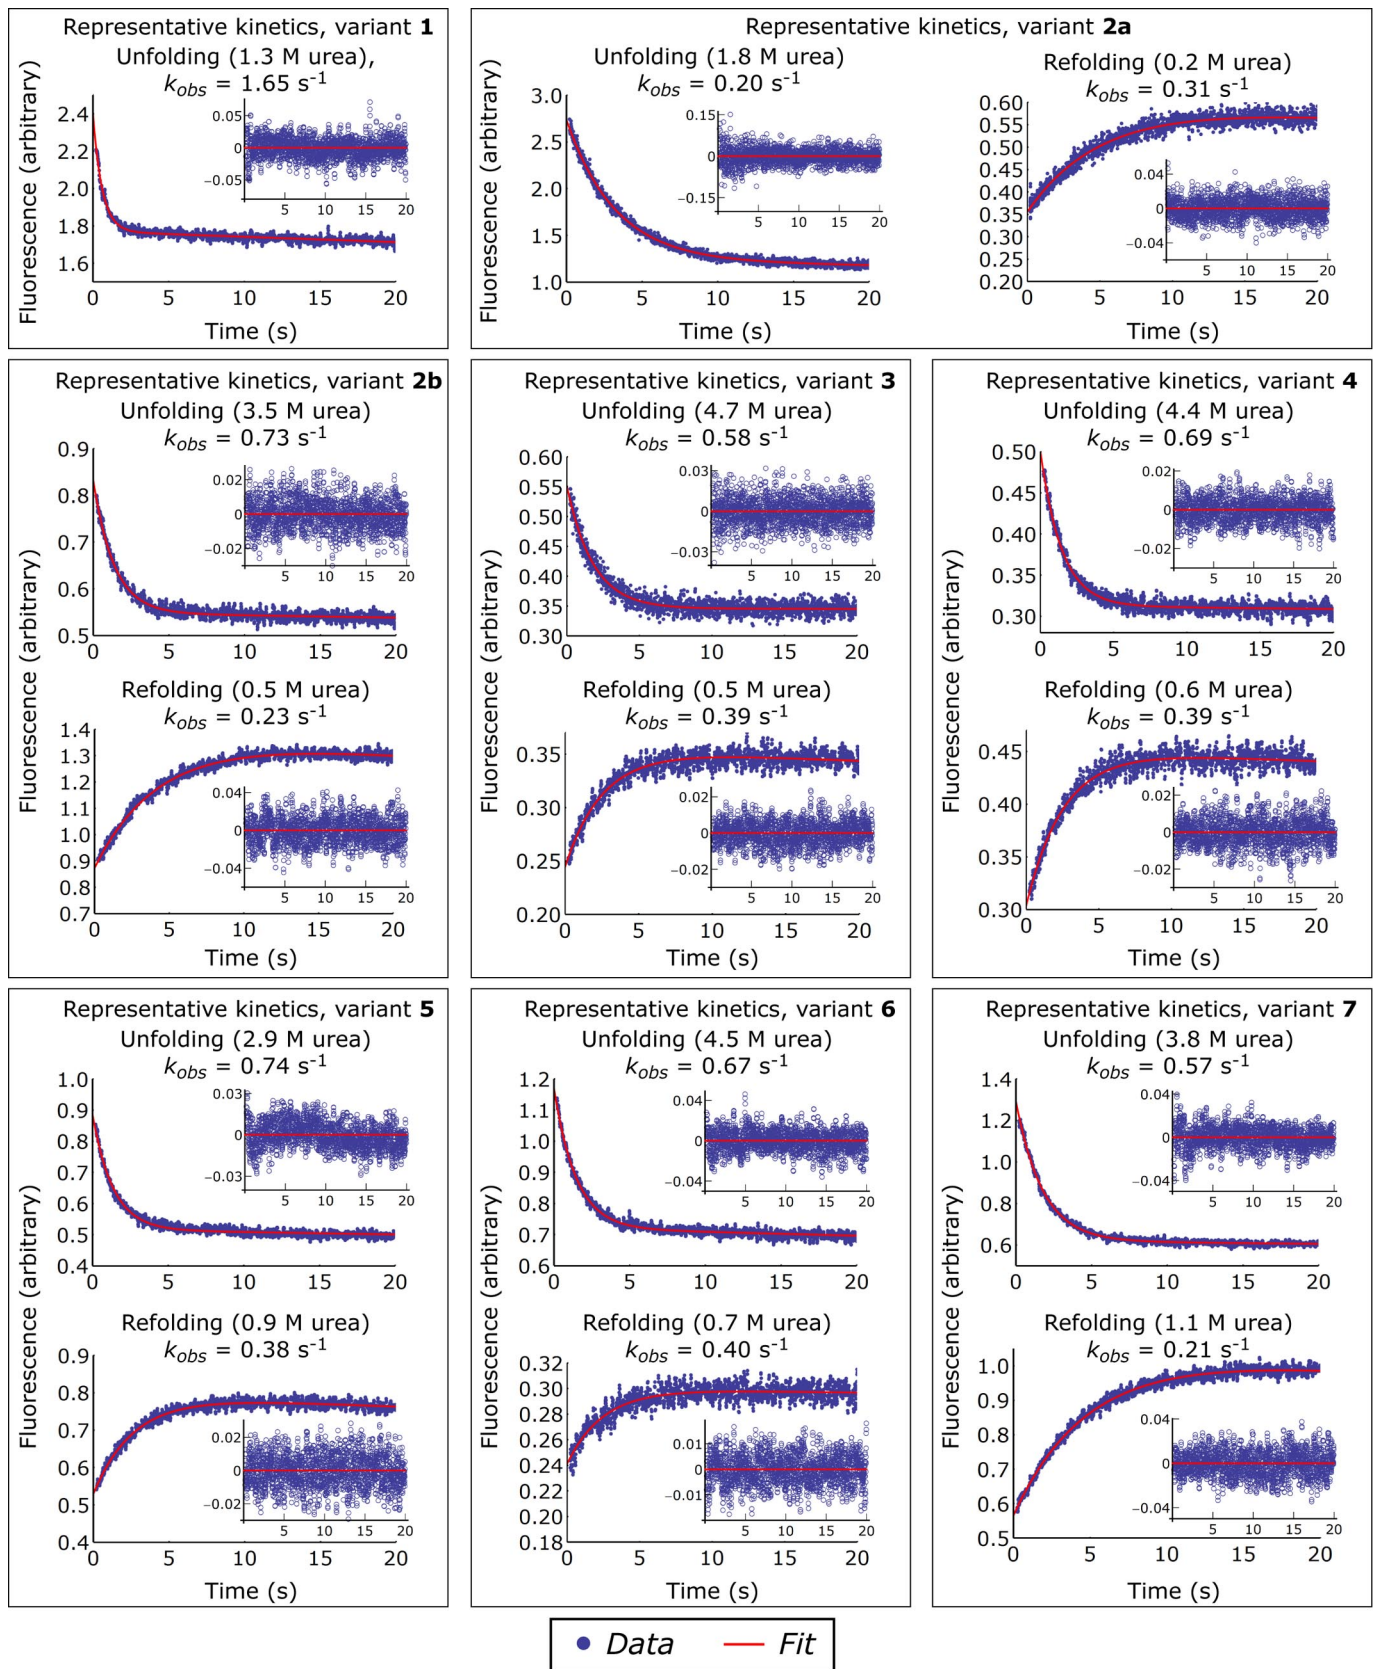

Fig. S3. Representative hCD2ad variant kinetic plots and fits. Residuals are shown as insets.

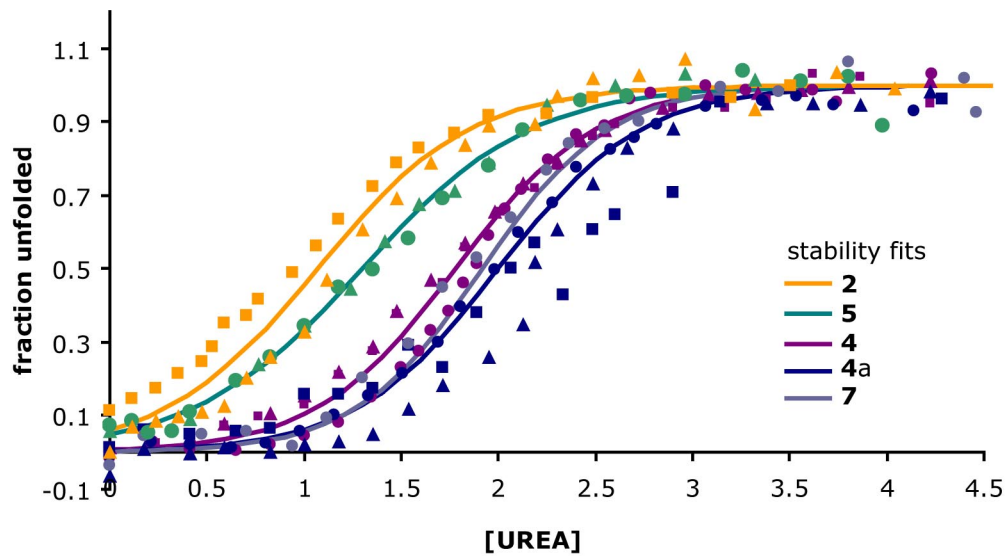

| Stability from Thermodynamics |   |                                |                          |   | Stability from Kinetics        |                          |
|-------------------------------|---|--------------------------------|--------------------------|---|--------------------------------|--------------------------|
| hCD2ad variant                |   | $\Delta G_{f,0}$<br>(kcal/mol) | $m_{eq}$<br>(kcal/mol M) | n | $\Delta G_{f,0}$<br>(kcal/mol) | $m_{eq}$<br>(kcal/mol M) |
| <b>2</b>                      | ● | $-1.6 \pm 0.4$                 | $1.5 \pm 0.2$            | 2 | $-1.5 \pm 0.1$                 | $1.62 \pm 0.09$          |
| <b>5</b>                      | ● | $-1.8 \pm 0.3$                 | $1.4 \pm 0.1$            | 2 | $-1.6 \pm 0.1$                 | $1.53 \pm 0.14$          |
| <b>4</b>                      | ● | $-2.9 \pm 0.2$                 | $1.6 \pm 0.1$            | 3 | $-2.9 \pm 0.2$                 | $1.57 \pm 0.14$          |
| <b>4a</b>                     | ● | $-3.2 \pm 0.8$                 | $1.5 \pm 0.2$            | 3 | —                              | —                        |
| <b>7</b>                      | ● | $-3.5 \pm 0.8$                 | $1.8 \pm 0.3$            | 2 | $-2.5 \pm 0.1$                 | $1.66 \pm 0.08$          |

**Fig. S4.** Representative hCD2ad variant urea denaturation curves. Stabilities obtained by equilibrium thermodynamics and kinetics are in agreement, which is a good indication of 2-state behavior.

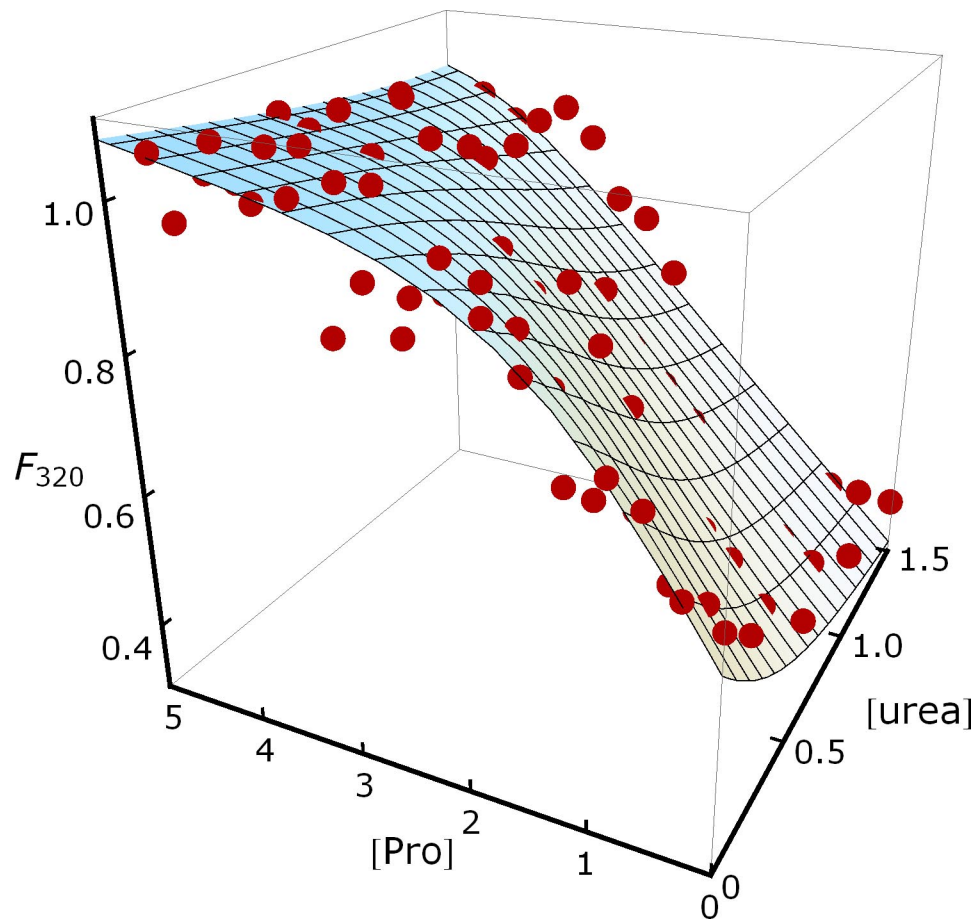

**Fig. S5.** hCD2ad variant 1 urea/proline denaturation/renaturation surface and fit. Points represent experimental  $F_{320}$  values and the surface represents the fit to these values.  $F_{320}$  is measured in arbitrary units.

**Table S1. MS characterization of hCD2ad glycoforms from HEK cells (hCD2ad variant 3)**

| N-glycan type | MS <sub>found</sub> | RA  | Structure                                                |
|---------------|---------------------|-----|----------------------------------------------------------|
| Hybrid        | 15,441              | 100 | GlcNAcMan <sub>5</sub> GlcNAc <sub>2</sub>               |
| Complex       | 15,646              | 79  | LacNAc <sub>2</sub> ManGlcNAc <sub>2</sub>               |
| Oligomannose  | 15,372              | 67  | Man <sub>6</sub> GlcNAc <sub>2</sub>                     |
| Complex       | 15,793              | 60  | LacNAc <sub>2</sub> ManGlcNAc <sub>2</sub> + Fuc         |
| Hybrid        | 15,591              | 60  | LacNAc <sub>2</sub> Man <sub>5</sub> GlcNAc <sub>2</sub> |
| Hybrid        | 15,282              | 56  | LacNAc <sub>2</sub> Man <sub>4</sub> GlcNAc <sub>2</sub> |

RA, relative abundance

**Table S2. MS characterization of hCD2ad insect glycoforms**

| N-glycan type                              | MW <sub>expected</sub> | RA    |       |       |     |
|--------------------------------------------|------------------------|-------|-------|-------|-----|
|                                            |                        | Sf9-1 | Sf9-2 | Sf9-3 | Tn5 |
| Man <sub>3</sub> GlcNAc <sub>2</sub> (Fuc) | 15,031                 | 74    | 70    | 70    | 55  |
| Man <sub>6</sub> GlcNAc <sub>2</sub>       | 15,373                 | 15    | 24    | 20    | 28  |
| Man <sub>3</sub> GlcNAc <sub>2</sub>       | 14,887                 | 10    | 6     | 20    | 10  |
| Man <sub>7</sub> GlcNAc <sub>2</sub>       | 15,535                 | 1     |       | 2     | 7   |

Sf9-1 to Sf9-3 and Tn5 are four preparations of hCD2ad variant 4. % RA, percentage of total relative abundance. Sf9-1 to -3 represent different preparations of hCD2ad from Sf9 host. Tn5 is a different insect expression host; see [SI Appendix](#).

**Table S3. MS characterization of remodeled hCD2ad variants (see Fig. 1C and Fig. S1)**

| hCD2ad variant        | MW <sub>expected</sub> | MW <sub>found</sub> | %   | Structure                                  | Enzyme step   |
|-----------------------|------------------------|---------------------|-----|--------------------------------------------|---------------|
| 5, sample 1           | 14,344                 | 14,342              | 72  | FucGlcNAc                                  | Endo D cut    |
|                       |                        | 14,195              | 28  | GlcNAc                                     |               |
| 5, sample 2           | 14,344                 | 14,342              | 75  | FucGlcNAc                                  | Endo D/H cut  |
|                       |                        | 14,195              | 25  | GlcNAc                                     |               |
| 6                     | 14,708                 | 14,709              | 44  | Man <sub>1</sub> GlcNAc <sub>2</sub> (Fuc) | α-Mannosidase |
|                       |                        | 14,870              | 25  | Man <sub>2</sub> GlcNAc <sub>2</sub> (Fuc) |               |
|                       |                        | 14,723              | 17  | Man <sub>2</sub> GlcNAc <sub>2</sub>       |               |
|                       |                        | 14,559              | 14  | Man <sub>1</sub> GlcNAc <sub>2</sub>       |               |
| 7                     | 15,373                 | 15,371              | 90  | Man <sub>6</sub> GlcNAc <sub>2</sub>       | Endo D uncut  |
|                       |                        | 15,533              | 10  | Man <sub>7</sub> GlcNAc <sub>2</sub>       |               |
| G                     | 14,197                 | 14,196              |     | GlcNAc                                     | Endo H cut    |
| Paucimannose          | 15,034                 | 15,031              | 100 | Man <sub>3</sub> GlcNAc <sub>2</sub> (Fuc) | Endo H uncut  |
| PNGase A or F treated | 13,994                 | 13,994              | 100 | Asn65Asp                                   | PNGase        |

## Other Supporting Information Files

[Dataset S1](#)

[SI Appendix](#)
